# Supplementary material
Source: publisher figshare collection journal article supplement (https://sage.figshare.com/ndownloader/files/17291693)
Supplement: Supplementary file 1 [file 17291693]

## a list of notation

$\alpha$

$\beta$

$\mu$

$\rho$

$\sigma$

$\tau$

$\varphi$
